# Supplementary material for: Quantitative estimation of NH3 partial pressure in H2 desorbed from the Li–N–H system by Raman spectroscopy
Source: Royal Society of Chemistry journal article supplement (doi:10.1039/b503356j), 2005-01-01
Supplement: b503356j_2.pdf [file b503356j_2.pdf]

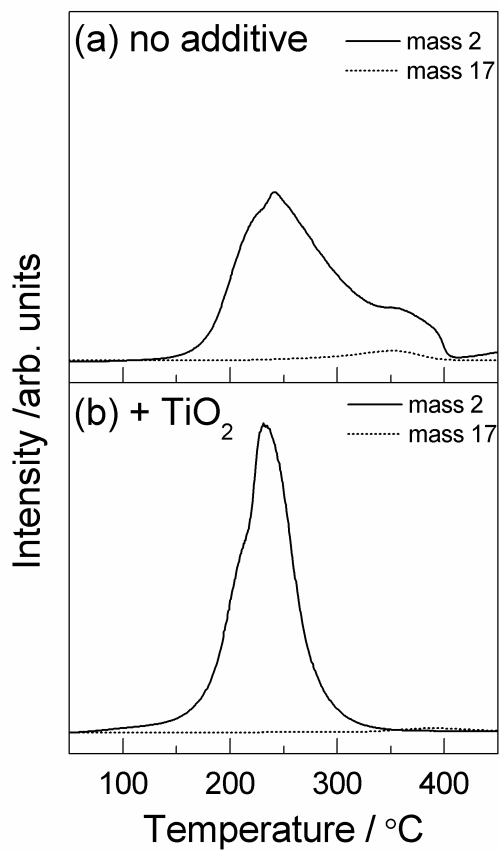

**Fig.** Thermal desorption mass spectra of (a) a mixture of 1:1 LiH + LiNH<sub>2</sub> and (b) the mixture with 1 mol% TiO<sub>2</sub> in the heating process up to 450 °C under a He gas flow atmosphere at a heating rate of 5 °C/min. Solid and dotted lines indicate mass 2 and mass 17, respectively.
