# Supplementary figures and images for: Quantitative estimation of NH3 partial pressure in H2 desorbed from the Li–N–H system by Raman spectroscopy
Source: Royal Society of Chemistry journal article supplement (doi:10.1039/b503356j), 2005-01-01

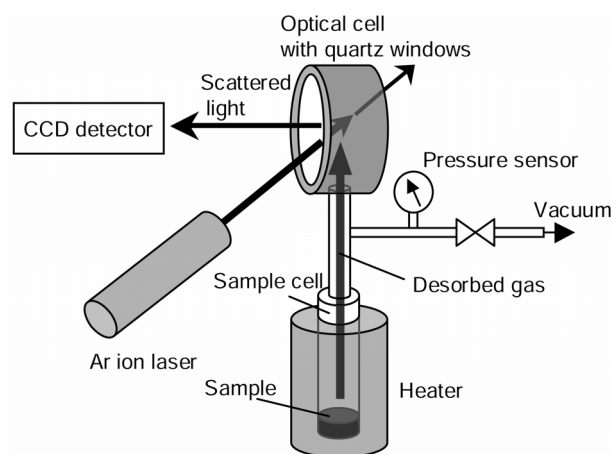

**Fig.** Schematic diagram of the apparatus.

Supplement: b503356j_1.pdf [file b503356j_1.pdf]
